# Supplementary material for: In Vitro Activity and Microbiological Efficacy of Gepotidacin from a Phase 2, Randomized, Multicenter, Dose-Ranging Study in Patients with Acute Bacterial Skin and Skin Structure Infections
Source: PubMed Central journal article supplement (PMC7038298; doi:10.1128/aac.01302-19), 2020-02-21
Supplement: AAC.01302-19-s0001.pdf [file AAC.01302-19-s0001.pdf]

## Supplemental Materials

**TABLE S1.** Frequency distribution of gepotidacin MICs ( $\mu\text{g/ml}$ ) against *S. aureus* from lesion samples by visit (mMITT population).

| Visit (n)                 | Number of isolates with indicated gepotidacin MIC |      |      |     |   |   |   |   |    |    |     |  |
|---------------------------|---------------------------------------------------|------|------|-----|---|---|---|---|----|----|-----|--|
|                           | $\leq 0.06$                                       | 0.12 | 0.25 | 0.5 | 1 | 2 | 4 | 8 | 16 | 32 | >32 |  |
| Baseline (78)             | 0                                                 | 10   | 50   | 13  | 2 | 1 | 0 | 1 | 0  | 0  | 1   |  |
| IV – Day 1 (3)            | 0                                                 | 0    | 3    | 0   | 0 | 0 | 0 | 0 | 0  | 0  | 0   |  |
| IV – Day 2 (30)           | 0                                                 | 5    | 19   | 5   | 0 | 0 | 0 | 1 | 0  | 0  | 0   |  |
| Early Efficacy (17)       | 0                                                 | 4    | 12   | 1   | 0 | 0 | 0 | 0 | 0  | 0  | 0   |  |
| IV – Day 3 (4)            | 0                                                 | 0    | 4    | 0   | 0 | 0 | 0 | 0 | 0  | 0  | 0   |  |
| IV – Day 4 (1)            | 0                                                 | 0    | 1    | 0   | 0 | 0 | 0 | 0 | 0  | 0  | 0   |  |
| IV – Day 5 (3)            | 0                                                 | 0    | 3    | 0   | 0 | 0 | 0 | 0 | 0  | 0  | 0   |  |
| IV – Day 6 (2)            | 0                                                 | 0    | 2    | 0   | 0 | 0 | 0 | 0 | 0  | 0  | 0   |  |
| IV – Day 7 (1)            | 0                                                 | 0    | 1    | 0   | 0 | 0 | 0 | 0 | 0  | 0  | 0   |  |
| IV – Day 8 (1)            | 0                                                 | 0    | 1    | 0   | 0 | 0 | 0 | 0 | 0  | 0  | 0   |  |
| Oral – Day 1 (3)          | 0                                                 | 0    | 3    | 0   | 0 | 0 | 0 | 0 | 0  | 0  | 0   |  |
| Oral – Day 7-10 (1)       | 0                                                 | 0    | 0    | 1   | 0 | 0 | 0 | 0 | 0  | 0  | 0   |  |
| Overall Postbaseline (66) | 0                                                 | 9    | 49   | 7   | 0 | 0 | 0 | 1 | 0  | 0  | 0   |  |

IV, intravenous; MIC, minimum inhibitory concentration; mMITT, modified microbiological intent-to-treat.

**TABLE S2.** Gepotidacin MICs against Gram-positive (other than *S. aureus*) and Gram-negative aerobic isolates recovered from pretreatment lesion samples (mMITT population).

| Pathogen                                                                        | Number of isolates | MIC range, min – max (µg/ml) | MIC <sub>50</sub> (µg/ml) | MIC <sub>90</sub> (µg/ml) |
|---------------------------------------------------------------------------------|--------------------|------------------------------|---------------------------|---------------------------|
| <b>Gram-positive aerobic pathogens (excluding <i>S. aureus</i>)<sup>a</sup></b> | 11                 | ≤0.06 to 0.5                 | 0.25                      | 0.5                       |
| <b>Gram-negative aerobic isolates</b>                                           |                    |                              |                           |                           |
| <i>Klebsiella pneumoniae</i>                                                    | 8                  | 4 to 8                       | 8                         | 8                         |
| <i>Serratia marcescens</i>                                                      | 3                  | 8                            | NA                        | NA                        |
| <i>Escherichia coli</i>                                                         | 1                  | 4                            | NA                        | NA                        |
| <i>Enterobacter cloacae</i>                                                     | 2                  | 8 to 16                      | NA                        | NA                        |
| <i>Leclercia adecarboxylata</i>                                                 | 1                  | 4                            | NA                        | NA                        |
| <i>Acinetobacter</i> spp.                                                       | 1                  | 32                           | NA                        | NA                        |
| <i>Pseudomonas aeruginosa</i>                                                   | 2                  | 8                            | NA                        | NA                        |
| <i>Haemophilus</i> spp.                                                         | 2                  | 2                            | NA                        | NA                        |
| <i>Klebsiella oxytoca</i>                                                       | 1                  | 2                            | NA                        | NA                        |

MIC, minimum inhibitory concentration; MIC<sub>50</sub>, median minimum inhibitory concentration; MIC<sub>90</sub>, 90<sup>th</sup> percentile minimum inhibitory concentration; mMITT, modified microbiological intent-to-treat.

<sup>a</sup>Other Gram-positive aerobes included β-hemolytic *Streptococcus* groups A, F, and G; *Staphylococcus epidermidis*; *Staphylococcus lugdunensis*; and *Streptococcus viridans*.

**TABLE S3.** Multilocus sequence typing (MLST) of the 12 isolates selected for whole genome sequencing using 7 housekeeping genes in the *S. aureus* MLST database.

| SampleID   | <i>arcC</i> | <i>aroE</i> | <i>glpF</i> | <i>gmk</i> | <i>pta</i> | <i>tpi</i> | <i>yqil</i> | MLST        | Gepotidacin              |
|------------|-------------|-------------|-------------|------------|------------|------------|-------------|-------------|--------------------------|
|            |             |             |             |            |            |            |             | Strain Type | MIC ( $\mu\text{g/mL}$ ) |
| isolate138 | 12          | 1           | 37          | 15         | 11         | 1          | 40          | 1598        | 0.25                     |
| isolate139 | 3           | 3           | 1           | 1          | 4          | 4          | 3           | 8           | 8                        |
| isolate141 | 3           | 3           | 1           | 1          | 4          | 4          | 3           | 8           | 0.25                     |
| isolate144 | 3           | 3           | 1           | 1          | 4          | 4          | 3           | 8           | 0.25                     |
| isolate146 | 10          | 14          | 8           | 6          | 10         | 3          | 2           | 45          | 1                        |
| isolate151 | 3           | 3           | 1           | 1          | 4          | 4          | 3           | 8           | 0.25                     |
| isolate212 | 3           | 3           | 1           | 1          | 4          | 4          | 3           | 8           | 0.5                      |
| isolate584 | 3           | 3           | 1           | 1          | 4          | 4          | 3           | 8           | 0.12                     |
| isolate586 | 3           | 3           | 1           | 1          | 4          | 4          | 3           | 8           | 0.25                     |
| isolate713 | 3           | 3           | 1           | 1          | 4          | 4          | 3           | 8           | >32                      |
| isolate825 | 1           | 1           | 1           | 1          | 1          | 1          | 1           | 1           | 0.25                     |
| isolate832 | 3           | 3           | 1           | 1          | 4          | 4          | 3           | 8           | 0.25                     |

MIC, minimum inhibitory concentration; MLST, multilocus sequence typing.

**TABLE S4.** Microbiological response and outcomes at the early and posttherapy visits for Gram-positive pathogens (other than *S. aureus*) from pretreatment lesion samples (mMITT population).

| Pathogen<br>Microbiological<br>response and<br>outcome | Early efficacy visit  |                           |                             |                           | Posttherapy visit         |                           |                       |                           |
|--------------------------------------------------------|-----------------------|---------------------------|-----------------------------|---------------------------|---------------------------|---------------------------|-----------------------|---------------------------|
|                                                        | 750 mg<br>q12h        | 1,000 mg<br>q12h          | 1,000 mg<br>q8h             | Total                     | 750 mg<br>q12h            | 1,000 mg<br>q12h          | 1,000 mg<br>q8h       | Total                     |
| <b>Other Gram-positive<br/>pathogens</b>               |                       |                           |                             |                           |                           |                           |                       |                           |
| Patients/pathogens,<br>n/n                             | 4/4                   | 4/4                       | 3/3                         | 11/11                     | 4/4                       | 4/4                       | 3/3                   | 11/11                     |
| Microbiological<br>success, n (%) [95%<br>CI]          | 2 (50)<br>[6.8, 93.2] | 3 (75)<br>[19.4,<br>99.4] | 3 (100)<br>[29.2,<br>100.0] | 8 (73)<br>[39.0,<br>94.0] | 3 (75)<br>[19.4,<br>99.4] | 3 (75)<br>[19.4,<br>99.4] | 2 (67)<br>[9.4, 99.2] | 8 (73)<br>[39.0,<br>94.0] |
| Eradication                                            | 2 (50)                | 2 (50)                    | 0                           | 4 (36)                    | -                         | -                         | -                     | -                         |
| Presumed<br>eradication                                | 0                     | 1 (25)                    | 3 (100)                     | 4 (36)                    | 3 (75)                    | 3 (75)                    | 2 (67)                | 8 (73)                    |
| Microbiological failure,<br>n (%) [95% CI]             | 2 (50)<br>[6.8, 93.2] | 1 (25)<br>[0.6, 80.6]     | 0                           | 3 (27)<br>[6.0, 61.0]     | 1 (25)<br>[0.6-80.6]      | 1 (25)<br>[0.6-80.6]      | 1 (33)<br>[0.8-90.6]  | 3 (27)<br>[6.0-61.0]      |
| Persistence                                            | 1 (25)                | 1 (25)                    | 0                           | 2 (18)                    | -                         | -                         | -                     | -                         |
| Presumed<br>persistence                                | 1 (25)                | 0                         | 0                           | 1 (9)                     | 0                         | 1 (25)                    | 0                     | 1 (9)                     |
| Presumed<br>recurrence                                 | -                     | -                         | -                           | -                         | 1 (25)                    | 0                         | 1 (33)                | 2 (18)                    |

CI, confidence interval; mMITT, modified microbiological intent-to-treat; q8h, every 8 h; q12h, every 12 h.

### **Text S1. Clinical success/failure in Gram-negative isolates**

Definitive conclusions on the role of gepotidacin in the clinical success or failure of patients with Gram-negative isolates could not be made. Of the 17 patients in the mITT population who had a Gram-negative aerobic isolate recovered from their baseline lesion specimen, only 3 who had a Gram-negative aerobic pathogen did not receive concomitant antibacterial therapy and also did not have a co-infecting pathogen. These patients included 1 patient in the 750 mg q12h treatment group with an *Escherichia coli* isolate with a gepotidacin MIC value of 4 µg/ml; 1 in the 1000 mg q12h treatment group with a *K. pneumoniae* isolate with a gepotidacin MIC value of 4 to 8 µg/ml; and 1 in the 1000 mg q8h treatment group with a *Haemophilus* spp. isolate with a gepotidacin MIC value of 2 µg/ml.
